# Supplementary material for: Computational evidence for the substrate-assisted catalytic mechanism of O-GlcNAcase. A DFT investigation
Source: Royal Society of Chemistry journal article supplement (doi:10.1039/c0cp02308f), 2011-01-01
Supplement: c0cp02308f.pdf [file c0cp02308f.pdf]

# *Supporting Information*

*for*

## **Computational Evidence for the Substrate-Assisted Catalytic Mechanism of O-GlcNAcase. A DFT Investigation.**

Andrea Bottoni\*, Gian Pietro Miscione, Matteo Calvaresi\*

*Dipartimento di Chimica "G. Ciamician", Universita' di Bologna, via Selmi 2, 40126  
Bologna, Italy*

Email: [andrea.bottoni@unibo.it](mailto:andrea.bottoni@unibo.it)

### **Contents**

**Figure S1**

**Figure S2**

**Figure S3**

**Figure S4**

**Figure S5**

**Figure S6**

**Table S1**

**m0**

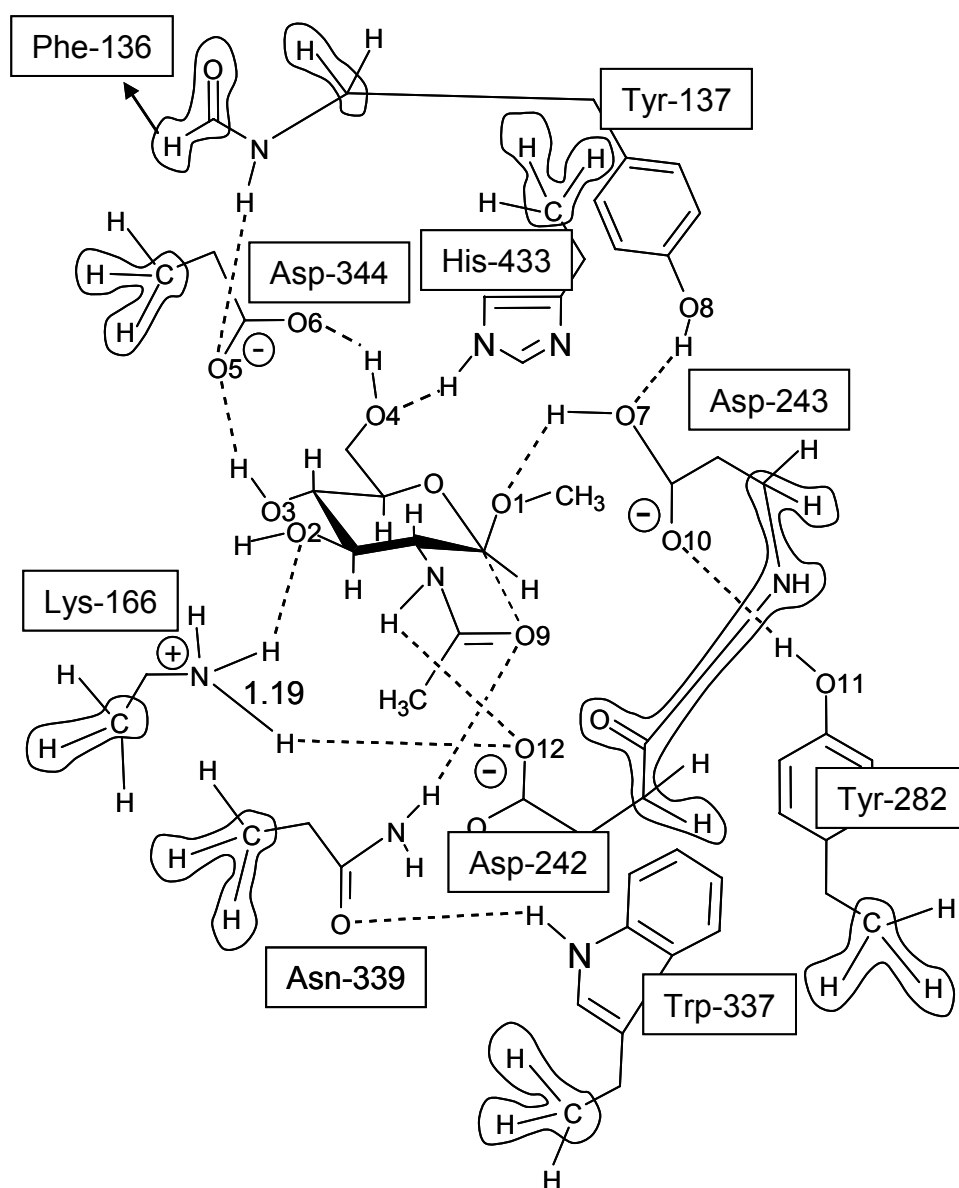

**Figure S1.** Two-dimensional schematic representation of the structure of the critical point **m0**. The frozen atoms are marked by contour lines.

**m0**

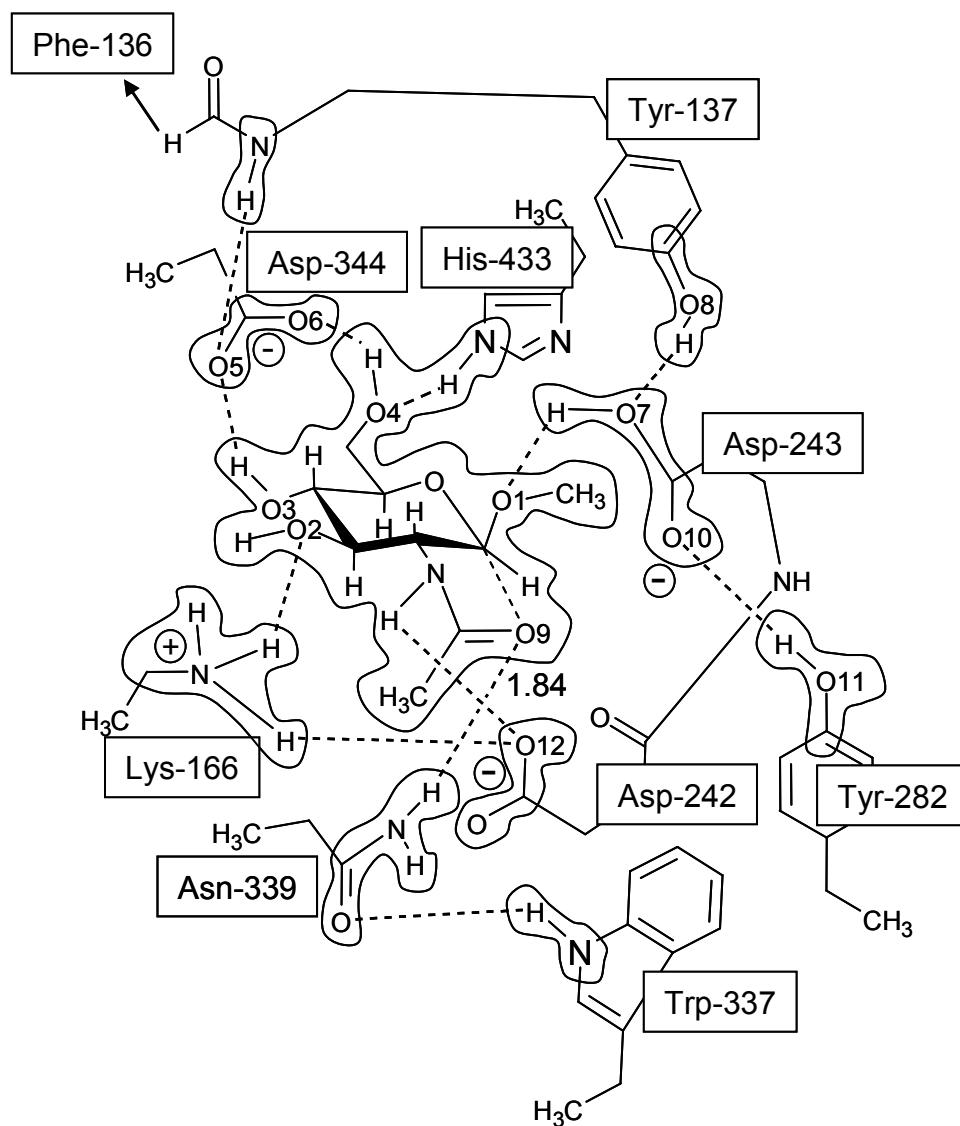

**Figure S2.** Two-dimensional schematic representation of the structure of the critical point **m0**. The atoms marked by contour lines are described by the DZVP basis set. The 3-21G\* basis has been used for all remaining atoms.

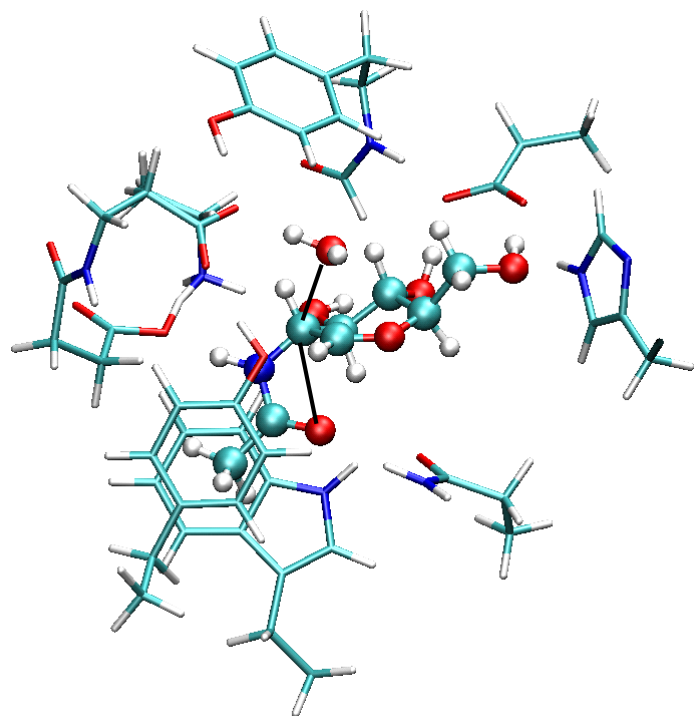

ts2

**Figure S3.** A three-dimensional representation of **ts2**. For the atoms directly involved in the process a ball-and-stick representation is used. The two main components of the reaction coordinate (approach of the nucleophile and departure of the water) are highlighted by two straight lines.

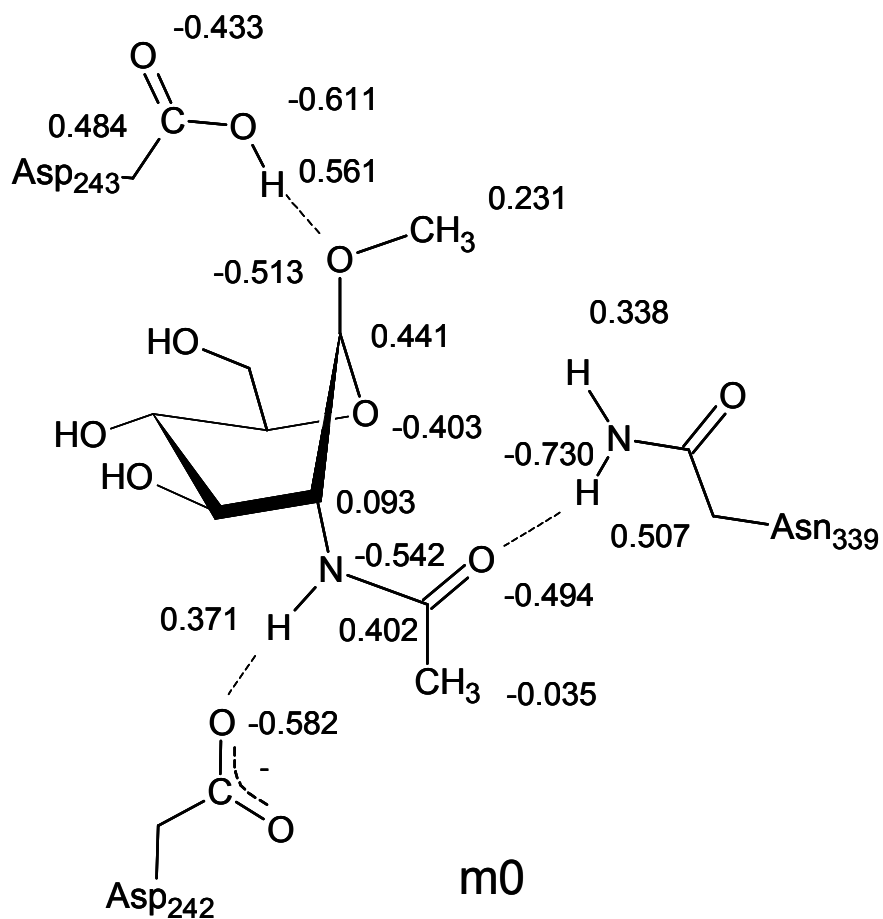

**Figure S4.** Net atomic charges (Mulliken) computed for **m0**.

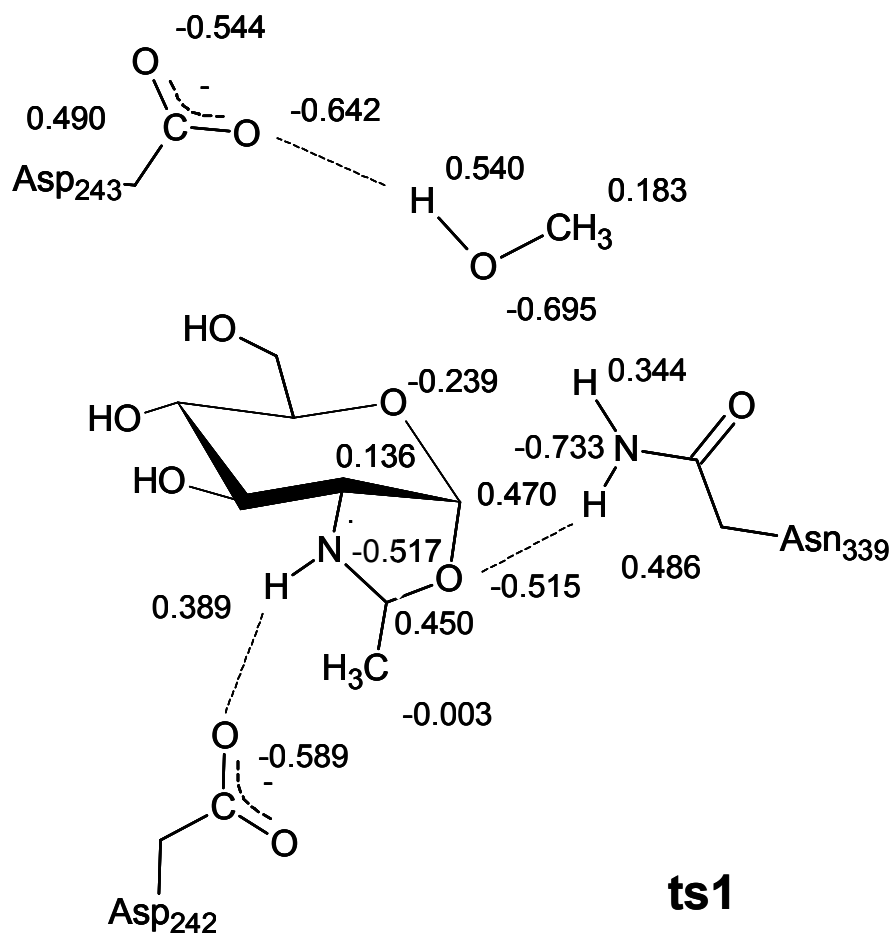

**Figure S5.** Net atomic charges (Mulliken) computed for **ts1**

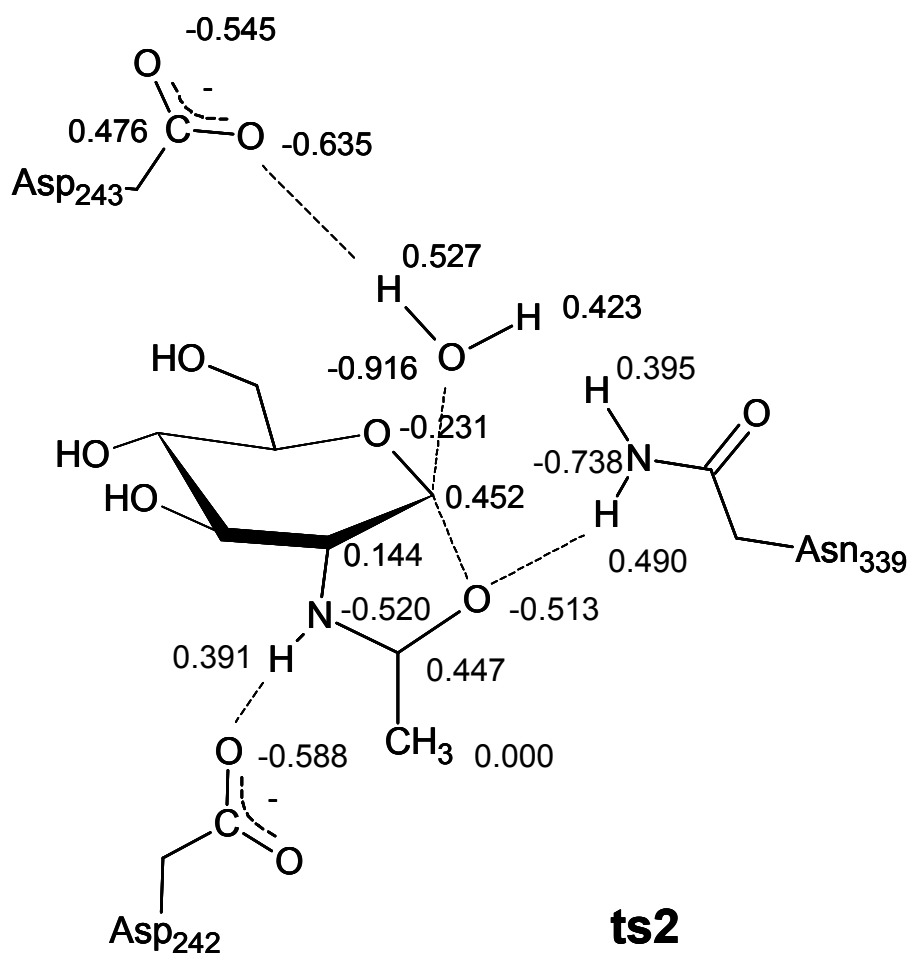

**Figure S6.** Net atomic charges (Mulliken) computed for **ts2**.

**Table S1.** Cartesian coordinates (Å), absolute total energy values (ET, hartee/particle) and Mulliken atomic charges for the various critical points located on the PES

**m0**, ET = -3892.764131

|   |           |           |            |           |
|---|-----------|-----------|------------|-----------|
| C | 12.705893 | -2.212052 | 3.766753   | 0.351157  |
| O | 11.602497 | -1.666010 | 3.838112   | -0.540096 |
| N | 12.991590 | -3.455598 | 4.263721   | -0.536609 |
| H | 13.914181 | -3.868789 | 4.081811   | 0.440191  |
| C | 12.051410 | -4.126827 | 5.187677   | -0.282886 |
| H | 11.062679 | -3.706714 | 4.989188   | 0.214522  |
| C | 12.079630 | -5.669697 | 5.049117   | -0.474482 |
| H | 13.105545 | -6.008935 | 5.240152   | 0.219705  |
| H | 11.449167 | -6.081026 | 5.848549   | 0.189024  |
| C | 11.618471 | -6.212050 | 3.709518   | -0.002890 |
| C | 10.264086 | -6.479342 | 3.465831   | -0.229796 |
| H | 9.531682  | -6.267650 | 4.239702   | 0.173832  |
| C | 9.837092  | -7.021783 | 2.253149   | -0.263323 |
| H | 8.788104  | -7.230267 | 2.067212   | 0.166090  |
| C | 10.776460 | -7.312312 | 1.260904   | 0.409726  |
| O | 10.315002 | -7.851478 | 0.082110   | -0.606184 |
| H | 11.059733 | -7.928097 | -0.543327  | 0.495576  |
| C | 12.132558 | -7.055601 | 1.484607   | -0.301641 |
| H | 12.868663 | -7.290677 | 0.718754   | 0.177824  |
| C | 12.544884 | -6.502204 | 2.699462   | -0.262469 |
| H | 13.596944 | -6.287333 | 2.861051   | 0.283990  |
| C | 9.369252  | -4.106927 | -0.624293  | -0.598127 |
| H | 8.904265  | -5.051766 | -0.321197  | 0.212766  |
| H | 9.142015  | -3.941141 | -1.687275  | 0.217356  |
| C | 10.879431 | -4.223530 | -0.418870  | -0.320724 |
| H | 11.155389 | -4.115028 | 0.637069   | 0.251183  |
| H | 11.229184 | -5.205302 | -0.755878  | 0.227627  |
| N | 11.632388 | -3.223620 | -1.239865  | -0.827962 |
| H | 11.269836 | -2.279258 | -1.094777  | 0.372891  |
| H | 12.633366 | -3.231739 | -0.980823  | 0.481640  |
| H | 11.604982 | -3.541352 | -2.383680  | 0.439230  |
| C | 10.127385 | -5.687502 | -6.519331  | -0.454880 |
| H | 10.601416 | -6.159402 | -7.390439  | 0.172490  |
| C | 11.214217 | -4.832931 | -5.798851  | -0.476634 |
| H | 12.096727 | -5.445914 | -5.608107  | 0.235219  |
| H | 11.529102 | -4.017231 | -6.463991  | 0.227614  |
| C | 10.777631 | -4.195634 | -4.458422  | 0.656092  |
| O | 9.636175  | -3.778522 | -4.223430  | -0.512024 |
| O | 11.806383 | -4.100317 | -3.594889  | -0.582282 |
| C | 9.616630  | -6.752682 | -5.532985  | 0.674685  |
| O | 8.758226  | -6.479231 | -4.691189  | -0.500857 |
| C | 15.624266 | -5.138434 | -11.056425 | -0.542501 |
| H | 15.433193 | -4.389702 | -11.838641 | 0.177473  |
| C | 15.149844 | -4.571845 | -9.684046  | -0.438913 |
| H | 15.801957 | -3.743186 | -9.381496  | 0.204889  |
| H | 14.138334 | -4.163253 | -9.795435  | 0.190778  |
| C | 15.129792 | -5.637876 | -8.598658  | -0.011231 |
| C | 16.316078 | -6.094284 | -8.002344  | -0.222926 |
| H | 17.265427 | -5.667480 | -8.310753  | 0.182907  |
| C | 16.299085 | -7.056785 | -6.994732  | -0.248090 |
| H | 17.215132 | -7.379828 | -6.511966  | 0.182493  |
| C | 15.079557 | -7.581580 | -6.554798  | 0.436180  |
| O | 15.109957 | -8.504765 | -5.541732  | -0.613928 |
| H | 14.218862 | -8.605088 | -5.150235  | 0.500480  |
| C | 13.888633 | -7.160058 | -7.152165  | -0.296938 |
| H | 12.942239 | -7.567535 | -6.808005  | 0.161048  |
| C | 13.922295 | -6.195850 | -8.163908  | -0.229226 |



|   |           |            |           |           |
|---|-----------|------------|-----------|-----------|
| H | 12.989569 | -5.855609  | -8.604294 | 0.177912  |
| C | 18.782406 | 1.874198   | -6.417431 | -0.548814 |
| H | 18.657367 | 2.777840   | -5.813825 | 0.191607  |
| C | 17.464842 | 1.063731   | -6.486661 | -0.451308 |
| H | 16.698120 | 1.722153   | -6.918062 | 0.189702  |
| H | 17.603187 | 0.243260   | -7.207843 | 0.198984  |
| C | 16.942116 | 0.498689   | -5.197715 | 0.009656  |
| C | 17.652767 | 0.032177   | -4.117509 | -0.168956 |
| H | 18.715867 | 0.033452   | -3.939114 | 0.182842  |
| N | 16.794958 | -0.520053  | -3.176331 | -0.337793 |
| H | 17.142046 | -1.161868  | -2.463666 | 0.447081  |
| C | 15.503408 | -0.469687  | -3.667599 | 0.086960  |
| C | 14.306647 | -0.972859  | -3.143910 | -0.282758 |
| H | 14.302082 | -1.522579  | -2.209608 | 0.240426  |
| C | 13.146490 | -0.790180  | -3.890508 | -0.198239 |
| H | 12.213764 | -1.219943  | -3.544115 | 0.179099  |
| C | 13.169423 | -0.107856  | -5.127027 | -0.194170 |
| H | 12.243581 | 0.017829   | -5.677753 | 0.165329  |
| C | 14.359793 | 0.382904   | -5.652494 | -0.226142 |
| H | 14.370799 | 0.889940   | -6.611796 | 0.159193  |
| C | 15.551909 | 0.195289   | -4.931795 | -0.027863 |
| C | 21.207931 | -1.153388  | -1.795575 | -0.615452 |
| H | 20.264547 | -0.625040  | -1.616426 | 0.238265  |
| C | 20.881912 | -2.673509  | -1.922329 | -0.447758 |
| H | 21.591296 | -3.177338  | -2.590283 | 0.162639  |
| H | 20.971083 | -3.142757  | -0.933360 | 0.208590  |
| C | 19.436424 | -2.899770  | -2.362523 | 0.427915  |
| O | 18.513984 | -2.277750  | -1.814479 | -0.461718 |
| N | 19.223274 | -3.797346  | -3.351119 | -0.729637 |
| H | 18.267251 | -4.026044  | -3.647870 | 0.507052  |
| H | 19.988018 | -4.339991  | -3.726076 | 0.338427  |
| C | 17.535262 | -5.643659  | 6.368001  | -0.573444 |
| H | 17.262231 | -5.468420  | 7.424911  | 0.157240  |
| C | 16.348898 | -5.147802  | 5.522029  | -0.424151 |
| H | 15.416287 | -5.601838  | 5.893070  | 0.171518  |
| H | 16.220690 | -4.063152  | 5.635902  | 0.175956  |
| C | 16.422968 | -5.453509  | 4.027196  | 0.449924  |
| O | 17.327807 | -6.215293  | 3.605415  | -0.517560 |
| O | 15.507891 | -4.898637  | 3.314831  | -0.621380 |
| C | 23.538689 | -12.003786 | -1.252270 | -0.548162 |
| H | 22.900186 | -12.339981 | -2.075261 | 0.180600  |
| C | 23.270821 | -10.508755 | -0.908327 | -0.449772 |
| H | 24.139646 | -10.144425 | -0.338389 | 0.197292  |
| H | 23.228529 | -9.913691  | -1.829197 | 0.179733  |
| C | 22.036490 | -10.254009 | -0.087355 | 0.226500  |
| N | 21.569412 | -11.163414 | 0.870217  | -0.568024 |
| C | 20.551558 | -10.546959 | 1.478244  | 0.114446  |
| H | 19.948127 | -10.951939 | 2.273065  | 0.189846  |
| N | 20.342299 | -9.291448  | 0.967528  | -0.386199 |
| H | 19.640916 | -8.598102  | 1.262478  | 0.485050  |
| C | 21.278900 | -9.101057  | -0.032078 | -0.213088 |
| H | 21.332501 | -8.184276  | -0.593239 | 0.174855  |
| N | 10.150301 | -7.975048  | -5.648305 | -0.702393 |
| H | 10.842887 | -8.103518  | -6.371783 | 0.328455  |
| C | 9.941438  | -9.118417  | -4.734205 | -0.230263 |
| H | 10.609792 | -9.904653  | -5.095283 | 0.219035  |
| C | 10.361416 | -8.727576  | -3.305605 | -0.481003 |
| H | 9.823726  | -7.812302  | -3.027413 | 0.259449  |
| H | 10.089733 | -9.502478  | -2.575528 | 0.208146  |
| C | 11.855847 | -8.505819  | -3.245555 | 0.484400  |
| O | 12.625712 | -8.747176  | -4.168791 | -0.432908 |
| O | 12.278533 | -8.047194  | -2.057818 | -0.611391 |
| H | 13.286075 | -7.921712  | -2.071239 | 0.560620  |

|   |           |            |            |           |
|---|-----------|------------|------------|-----------|
| O | 16.586417 | -4.475391  | -4.247119  | -0.493630 |
| C | 15.364344 | -4.273932  | -4.375856  | 0.401822  |
| C | 14.812774 | -3.475610  | -5.536900  | -0.747411 |
| H | 14.946848 | -4.053961  | -6.455130  | 0.239731  |
| H | 15.384737 | -2.549529  | -5.622826  | 0.252711  |
| H | 13.759177 | -3.228597  | -5.403600  | 0.213875  |
| N | 14.447661 | -4.769448  | -3.509195  | -0.541729 |
| H | 13.444023 | -4.525824  | -3.641465  | 0.371484  |
| C | 14.804944 | -5.419231  | -2.252368  | -0.141288 |
| H | 13.858294 | -5.731959  | -1.803620  | 0.233540  |
| C | 15.477640 | -4.486894  | -1.246051  | 0.071600  |
| O | 14.530514 | -3.518767  | -0.752260  | -0.724585 |
| H | 14.938953 | -3.243308  | 0.097895   | 0.445346  |
| H | 16.314663 | -3.959375  | -1.713126  | 0.280343  |
| C | 15.997486 | -5.296301  | -0.053549  | -0.114443 |
| O | 16.417590 | -4.362081  | 0.920472   | -0.684134 |
| H | 16.093537 | -4.643900  | 1.831721   | 0.534287  |
| H | 15.170176 | -5.905789  | 0.342709   | 0.196430  |
| C | 17.143719 | -6.208373  | -0.521004  | 0.021924  |
| C | 17.424321 | -7.444134  | 0.360275   | -0.262488 |
| O | 18.389721 | -7.224226  | 1.376766   | -0.708865 |
| H | 17.963352 | -6.784146  | 2.167824   | 0.529113  |
| H | 16.488653 | -7.838921  | 0.783296   | 0.188381  |
| H | 17.842553 | -8.210295  | -0.300809  | 0.203634  |
| H | 18.054299 | -5.603570  | -0.551588  | 0.254357  |
| O | 16.949089 | -6.657064  | -1.896514  | -0.403017 |
| C | 15.673922 | -6.696805  | -2.448648  | 0.156992  |
| H | 15.827783 | -6.894229  | -3.510471  | 0.283911  |
| O | 14.900058 | -7.813207  | -1.899371  | -0.512966 |
| C | 15.490964 | -9.102581  | -2.165612  | -0.468181 |
| H | 14.767433 | -9.851475  | -1.834529  | 0.209564  |
| H | 16.418641 | -9.221757  | -1.603880  | 0.242063  |
| H | 15.687281 | -9.220563  | -3.235400  | 0.247210  |
| H | 18.994928 | 2.145635   | -7.450426  | 0.177758  |
| H | 19.639348 | 1.315193   | -6.044492  | 0.183345  |
| H | 21.643856 | -0.760307  | -2.712845  | 0.181238  |
| H | 21.812537 | -0.988626  | -0.904942  | 0.193192  |
| H | 24.584864 | -12.053658 | -1.550579  | 0.165064  |
| H | 23.319190 | -12.607174 | -0.372695  | 0.219111  |
| H | 18.428182 | -5.036640  | 6.226044   | 0.191312  |
| H | 17.647626 | -6.723955  | 6.288982   | 0.203903  |
| H | 15.007184 | -6.007291  | -11.280522 | 0.194717  |
| H | 16.702914 | -5.285905  | -11.029984 | 0.190051  |
| H | 9.328322  | -5.049903  | -6.894675  | 0.233117  |
| H | 8.935647  | -9.535675  | -4.748665  | 0.218497  |
| H | 13.583956 | -1.683070  | 3.399181   | 0.146447  |
| H | 12.355633 | -3.889576  | 6.206052   | 0.181916  |
| H | 8.925810  | -3.320599  | -0.015220  | 0.171297  |

**ts1**, ET = -3892.737821

|   |           |           |            |           |
|---|-----------|-----------|------------|-----------|
| C | 12.704534 | -2.224795 | 3.747439   | 0.350557  |
| O | 11.602202 | -1.676457 | 3.817641   | -0.537159 |
| N | 12.990775 | -3.462383 | 4.253522   | -0.534196 |
| H | 13.908263 | -3.884493 | 4.078644   | 0.436438  |
| C | 12.045902 | -4.136002 | 5.171241   | -0.283279 |
| H | 11.059163 | -3.712284 | 4.970920   | 0.216891  |
| C | 12.072962 | -5.676856 | 5.002188   | -0.474103 |
| H | 13.097311 | -6.021748 | 5.195407   | 0.211544  |
| H | 11.436567 | -6.105291 | 5.787893   | 0.189258  |
| C | 11.622149 | -6.192818 | 3.645340   | -0.000677 |
| C | 10.266022 | -6.431733 | 3.379703   | -0.232835 |
| H | 9.526770  | -6.215179 | 4.146272   | 0.167505  |
| C | 9.846099  | -6.952570 | 2.156331   | -0.259130 |
| H | 8.795170  | -7.139089 | 1.956759   | 0.162251  |
| C | 10.785792 | -7.257617 | 1.162039   | 0.407935  |
| O | 10.315518 | -7.766869 | -0.011661  | -0.612892 |
| H | 11.039709 | -7.872206 | -0.686678  | 0.510625  |
| C | 12.146704 | -7.030901 | 1.412833   | -0.305263 |
| H | 12.885698 | -7.284417 | 0.656609   | 0.194244  |
| C | 12.551313 | -6.495861 | 2.640425   | -0.265546 |
| H | 13.606110 | -6.305176 | 2.816101   | 0.253531  |
| C | 9.365273  | -4.120063 | -0.641448  | -0.599475 |
| H | 8.917522  | -5.067778 | -0.323059  | 0.224488  |
| H | 9.113924  | -3.968022 | -1.701071  | 0.216599  |
| C | 10.874927 | -4.226009 | -0.474209  | -0.327162 |
| H | 11.177523 | -4.151380 | 0.577004   | 0.249641  |
| H | 11.227960 | -5.187524 | -0.862225  | 0.248650  |
| N | 11.586918 | -3.176439 | -1.273121  | -0.827289 |
| H | 11.188616 | -2.250370 | -1.105022  | 0.374112  |
| H | 12.583875 | -3.159918 | -1.007806  | 0.482616  |
| H | 11.578010 | -3.455015 | -2.407441  | 0.435024  |
| C | 10.121784 | -5.711533 | -6.533757  | -0.454842 |
| H | 10.598873 | -6.184274 | -7.402663  | 0.169882  |
| C | 11.210797 | -4.855458 | -5.813028  | -0.478666 |
| H | 12.073246 | -5.484408 | -5.587993  | 0.240604  |
| H | 11.559981 | -4.064984 | -6.492672  | 0.217700  |
| C | 10.777101 | -4.170986 | -4.497604  | 0.660438  |
| O | 9.629956  | -3.785878 | -4.246837  | -0.504295 |
| O | 11.824798 | -3.979903 | -3.659565  | -0.589152 |
| C | 9.608662  | -6.774116 | -5.545852  | 0.676326  |
| O | 8.750600  | -6.497636 | -4.704713  | -0.504838 |
| C | 15.620884 | -5.180522 | -11.070316 | -0.543510 |
| H | 15.430505 | -4.432280 | -11.852985 | 0.177390  |
| C | 15.139731 | -4.608393 | -9.701028  | -0.436786 |
| H | 15.783767 | -3.767317 | -9.413577  | 0.198872  |
| H | 14.126394 | -4.207088 | -9.823835  | 0.191593  |
| C | 15.114903 | -5.637064 | -8.575022  | -0.012086 |
| C | 16.290797 | -6.041103 | -7.920849  | -0.239583 |
| H | 17.247018 | -5.646703 | -8.252420  | 0.176387  |
| C | 16.255063 | -6.903161 | -6.824762  | -0.245008 |
| H | 17.165786 | -7.177886 | -6.302706  | 0.174536  |
| C | 15.027858 | -7.378690 | -6.341213  | 0.428816  |
| O | 15.039906 | -8.146064 | -5.212176  | -0.632753 |
| H | 14.122463 | -8.304242 | -4.855122  | 0.520746  |
| C | 13.851568 | -7.037262 | -7.017884  | -0.300908 |
| H | 12.902950 | -7.419455 | -6.654773  | 0.184403  |
| C | 13.903901 | -6.171958 | -8.116229  | -0.233425 |

|   |           |            |           |           |
|---|-----------|------------|-----------|-----------|
| H | 12.976936 | -5.882241  | -8.603084 | 0.177726  |
| C | 18.791715 | 1.833195   | -6.441677 | -0.550169 |
| H | 18.665393 | 2.738216   | -5.840526 | 0.193157  |
| C | 17.478413 | 1.020687   | -6.509813 | -0.451334 |
| H | 16.715502 | 1.666507   | -6.966363 | 0.193127  |
| H | 17.625764 | 0.182401   | -7.208307 | 0.199896  |
| C | 16.939450 | 0.488232   | -5.214869 | 0.009536  |
| C | 17.620234 | 0.108346   | -4.084123 | -0.155044 |
| H | 18.673592 | 0.160851   | -3.861607 | 0.184769  |
| N | 16.739202 | -0.421139  | -3.145731 | -0.351043 |
| H | 17.070557 | -1.041983  | -2.411892 | 0.424756  |
| C | 15.469230 | -0.455812  | -3.699903 | 0.093255  |
| C | 14.271031 | -0.990631  | -3.213768 | -0.284863 |
| H | 14.234233 | -1.485887  | -2.250199 | 0.235382  |
| C | 13.145213 | -0.905438  | -4.028749 | -0.202871 |
| H | 12.229757 | -1.395366  | -3.723826 | 0.193199  |
| C | 13.199355 | -0.276421  | -5.291313 | -0.196711 |
| H | 12.298865 | -0.223258  | -5.893257 | 0.171230  |
| C | 14.391249 | 0.248712   | -5.778411 | -0.223976 |
| H | 14.429836 | 0.713777   | -6.757883 | 0.162882  |
| C | 15.551026 | 0.144875   | -4.992182 | -0.030975 |
| C | 21.210071 | -1.191801  | -1.814380 | -0.613759 |
| H | 20.268934 | -0.657757  | -1.636815 | 0.235039  |
| C | 20.875795 | -2.708747  | -1.946100 | -0.448238 |
| H | 21.617577 | -3.225120  | -2.567419 | 0.166455  |
| H | 20.905541 | -3.166692  | -0.948168 | 0.213178  |
| C | 19.454327 | -2.933792  | -2.459044 | 0.424209  |
| O | 18.496940 | -2.339315  | -1.947230 | -0.453793 |
| N | 19.291758 | -3.818173  | -3.476492 | -0.732673 |
| H | 18.346244 | -4.062267  | -3.787665 | 0.486273  |
| H | 20.074271 | -4.349725  | -3.830731 | 0.344331  |
| C | 17.526448 | -5.661788  | 6.355401  | -0.573725 |
| H | 17.234137 | -5.481610  | 7.405018  | 0.160979  |
| C | 16.360723 | -5.166752  | 5.479238  | -0.427336 |
| H | 15.432746 | -5.685528  | 5.765705  | 0.177774  |
| H | 16.174281 | -4.098825  | 5.656478  | 0.177741  |
| C | 16.531148 | -5.357710  | 3.973766  | 0.453434  |
| O | 17.509699 | -6.019570  | 3.544232  | -0.520201 |
| O | 15.614273 | -4.812940  | 3.255397  | -0.616730 |
| C | 23.519229 | -12.045904 | -1.253177 | -0.546740 |
| H | 22.876600 | -12.372535 | -2.076193 | 0.183106  |
| C | 23.289233 | -10.541828 | -0.915031 | -0.448369 |
| H | 24.167392 | -10.204845 | -0.342245 | 0.198160  |
| H | 23.275884 | -9.951554  | -1.839902 | 0.180356  |
| C | 22.063582 | -10.223030 | -0.104599 | 0.227219  |
| N | 21.553778 | -11.076987 | 0.880353  | -0.566122 |
| C | 20.576288 | -10.388600 | 1.477706  | 0.115017  |
| H | 19.958820 | -10.737395 | 2.287991  | 0.193766  |
| N | 20.423337 | -9.142809  | 0.922180  | -0.391362 |
| H | 19.778100 | -8.394736  | 1.204575  | 0.476122  |
| C | 21.363518 | -9.033206  | -0.086621 | -0.204493 |
| H | 21.464823 | -8.137717  | -0.674964 | 0.169958  |
| N | 10.139958 | -7.997721  | -5.659094 | -0.696134 |
| H | 10.832469 | -8.128714  | -6.382176 | 0.321799  |
| C | 9.928600  | -9.139234  | -4.743212 | -0.221147 |
| H | 10.607641 | -9.920352  | -5.094834 | 0.211598  |
| C | 10.323020 | -8.753747  | -3.305467 | -0.450170 |
| H | 9.733083  | -7.878607  | -3.010525 | 0.237841  |
| H | 10.073891 | -9.564789  | -2.607103 | 0.183650  |
| C | 11.812796 | -8.438705  | -3.157845 | 0.489898  |
| O | 12.594587 | -8.629588  | -4.126143 | -0.543977 |
| O | 12.172984 | -8.011898  | -1.996914 | -0.642244 |
| H | 13.735764 | -8.037351  | -1.739221 | 0.540288  |

|   |           |            |            |           |
|---|-----------|------------|------------|-----------|
| O | 16.556291 | -4.666112  | -4.123331  | -0.514749 |
| C | 15.375090 | -4.289330  | -4.353979  | 0.449775  |
| C | 15.007162 | -3.485049  | -5.567499  | -0.746635 |
| H | 13.974560 | -3.141138  | -5.521210  | 0.232423  |
| H | 15.162883 | -4.100717  | -6.457284  | 0.261037  |
| H | 15.666213 | -2.615560  | -5.623901  | 0.251273  |
| N | 14.405907 | -4.629910  | -3.490505  | -0.516641 |
| H | 13.378256 | -4.420837  | -3.648520  | 0.389420  |
| C | 14.829965 | -5.273916  | -2.255604  | -0.182770 |
| H | 13.961081 | -5.781835  | -1.830373  | 0.319005  |
| C | 15.430490 | -4.317200  | -1.223633  | 0.061423  |
| O | 14.437115 | -3.427134  | -0.701324  | -0.715437 |
| H | 14.821486 | -3.152091  | 0.159708   | 0.448370  |
| H | 16.232020 | -3.728983  | -1.684112  | 0.276050  |
| C | 16.012519 | -5.123118  | -0.059301  | -0.116401 |
| O | 16.441451 | -4.191123  | 0.903166   | -0.678752 |
| H | 16.153017 | -4.494487  | 1.833253   | 0.532757  |
| H | 15.225603 | -5.773514  | 0.348496   | 0.239520  |
| C | 17.182907 | -5.988118  | -0.544034  | 0.009232  |
| C | 17.530283 | -7.210054  | 0.334201   | -0.274120 |
| O | 18.552118 | -6.940417  | 1.273491   | -0.695638 |
| H | 18.153173 | -6.531175  | 2.099282   | 0.527898  |
| H | 16.621738 | -7.586071  | 0.819779   | 0.217764  |
| H | 17.899707 | -7.995093  | -0.333527  | 0.218258  |
| H | 18.070292 | -5.366961  | -0.679246  | 0.281890  |
| O | 16.923078 | -6.562455  | -1.901787  | -0.238842 |
| C | 15.866636 | -6.328429  | -2.585295  | 0.070380  |
| H | 15.764853 | -6.924440  | -3.489128  | 0.399952  |
| O | 14.723620 | -8.065829  | -1.530691  | -0.694817 |
| C | 15.201635 | -9.385581  | -1.795546  | -0.448566 |
| H | 14.930800 | -10.065392 | -0.976494  | 0.204267  |
| H | 16.293125 | -9.346327  | -1.865844  | 0.200542  |
| H | 14.798001 | -9.773481  | -2.737132  | 0.226895  |
| H | 19.005028 | 2.102578   | -7.475048  | 0.180939  |
| H | 19.647447 | 1.273103   | -6.067622  | 0.183380  |
| H | 21.646999 | -0.801045  | -2.732158  | 0.185133  |
| H | 21.814769 | -1.026814  | -0.923848  | 0.197170  |
| H | 24.565386 | -12.098322 | -1.551146  | 0.167528  |
| H | 23.298313 | -12.647454 | -0.372708  | 0.217643  |
| H | 18.420602 | -5.056764  | 6.212697   | 0.194285  |
| H | 17.636693 | -6.742427  | 6.278127   | 0.200461  |
| H | 15.002163 | -6.048564  | -11.293172 | 0.196043  |
| H | 16.699244 | -5.330135  | -11.043349 | 0.188283  |
| H | 9.324078  | -5.072948  | -6.910330  | 0.227041  |
| H | 8.921987  | -9.554503  | -4.757277  | 0.202236  |
| H | 13.583736 | -1.698131  | 3.379250   | 0.141168  |
| H | 12.350341 | -3.897732  | 6.189317   | 0.180120  |
| H | 8.923232  | -3.331892  | -0.033736  | 0.166152  |

**m1**, ET = -3892.744396

|   |           |           |            |           |
|---|-----------|-----------|------------|-----------|
| C | 12.709892 | -2.241313 | 3.763317   | 0.347930  |
| O | 11.606988 | -1.694171 | 3.834061   | -0.540038 |
| N | 12.998018 | -3.479472 | 4.265271   | -0.532073 |
| H | 13.921113 | -3.887903 | 4.082688   | 0.438724  |
| C | 12.050855 | -4.158640 | 5.178624   | -0.284840 |
| H | 11.066319 | -3.729572 | 4.978341   | 0.215637  |
| C | 12.070437 | -5.698050 | 4.998040   | -0.472826 |
| H | 13.090443 | -6.051847 | 5.196657   | 0.211964  |
| H | 11.423211 | -6.128666 | 5.773933   | 0.188266  |
| C | 11.629543 | -6.194803 | 3.630712   | -0.002230 |
| C | 10.271349 | -6.368828 | 3.328784   | -0.234643 |
| H | 9.522275  | -6.122283 | 4.076707   | 0.165484  |
| C | 9.861363  | -6.862449 | 2.090518   | -0.259616 |
| H | 8.808475  | -7.000270 | 1.862694   | 0.159482  |
| C | 10.812324 | -7.200868 | 1.117441   | 0.403268  |
| O | 10.348389 | -7.672104 | -0.075471  | -0.616475 |
| H | 11.080178 | -7.778134 | -0.744084  | 0.504881  |
| C | 12.175684 | -7.045869 | 1.406557   | -0.314075 |
| H | 12.926458 | -7.337492 | 0.675757   | 0.217968  |
| C | 12.569609 | -6.539907 | 2.649856   | -0.261420 |
| H | 13.627374 | -6.408264 | 2.857188   | 0.250865  |
| C | 9.378429  | -4.122116 | -0.637746  | -0.600918 |
| H | 8.952981  | -5.076390 | -0.310556  | 0.232152  |
| H | 9.114809  | -3.978790 | -1.695286  | 0.214359  |
| C | 10.887151 | -4.188009 | -0.476305  | -0.327999 |
| H | 11.195718 | -4.119969 | 0.572931   | 0.254679  |
| H | 11.279241 | -5.123189 | -0.888494  | 0.257866  |
| N | 11.544655 | -3.086560 | -1.255116  | -0.808706 |
| H | 11.097041 | -2.185563 | -1.075362  | 0.377453  |
| H | 12.541574 | -3.034702 | -0.989794  | 0.483877  |
| H | 11.536819 | -3.343134 | -2.348228  | 0.422010  |
| C | 10.144613 | -5.689771 | -6.535184  | -0.455926 |
| H | 10.624882 | -6.157944 | -7.404551  | 0.172664  |
| C | 11.231806 | -4.835589 | -5.807238  | -0.483836 |
| H | 12.084400 | -5.472293 | -5.563530  | 0.239611  |
| H | 11.600363 | -4.053728 | -6.487079  | 0.215237  |
| C | 10.785210 | -4.135999 | -4.506922  | 0.668580  |
| O | 9.630333  | -3.784850 | -4.252980  | -0.496961 |
| O | 11.827672 | -3.880554 | -3.670624  | -0.598196 |
| C | 9.630985  | -6.756668 | -5.552185  | 0.675328  |
| O | 8.771503  | -6.484213 | -4.711182  | -0.504843 |
| C | 15.649651 | -5.136348 | -11.061830 | -0.543686 |
| H | 15.458438 | -4.381984 | -11.837863 | 0.178393  |
| C | 15.169980 | -4.576463 | -9.685185  | -0.436685 |
| H | 15.818945 | -3.741640 | -9.388986  | 0.196336  |
| H | 14.159248 | -4.167681 | -9.804924  | 0.190841  |
| C | 15.134606 | -5.618898 | -8.570705  | -0.014619 |
| C | 16.310353 | -6.107732 | -7.973901  | -0.248439 |
| H | 17.274953 | -5.766893 | -8.339493  | 0.176504  |
| C | 16.267601 | -6.998036 | -6.900068  | -0.246117 |
| H | 17.180612 | -7.350243 | -6.430491  | 0.176856  |
| C | 15.034629 | -7.423344 | -6.378109  | 0.411918  |
| O | 15.047429 | -8.232682 | -5.287178  | -0.610414 |
| H | 14.136081 | -8.356320 | -4.892609  | 0.518567  |
| C | 13.854778 | -6.987319 | -6.995763  | -0.301612 |
| H | 12.901182 | -7.330819 | -6.608701  | 0.191084  |
| C | 13.914304 | -6.094288 | -8.071399  | -0.238207 |

|   |           |            |           |           |
|---|-----------|------------|-----------|-----------|
| H | 12.987008 | -5.741945  | -8.514567 | 0.179298  |
| C | 18.807986 | 1.861833   | -6.401184 | -0.550668 |
| H | 18.673436 | 2.762152   | -5.795437 | 0.194601  |
| C | 17.501039 | 1.042434   | -6.488603 | -0.452217 |
| H | 16.736410 | 1.689306   | -6.941087 | 0.194996  |
| H | 17.658181 | 0.214756   | -7.197670 | 0.199132  |
| C | 16.959790 | 0.489937   | -5.205022 | 0.006518  |
| C | 17.626594 | 0.155084   | -4.053696 | -0.144400 |
| H | 18.671584 | 0.249014   | -3.807646 | 0.189205  |
| N | 16.742558 | -0.388415  | -3.123119 | -0.355643 |
| H | 17.087837 | -1.022021  | -2.408415 | 0.415896  |
| C | 15.488580 | -0.483094  | -3.709842 | 0.098390  |
| C | 14.293819 | -1.038410  | -3.239625 | -0.287933 |
| H | 14.243198 | -1.505563  | -2.261874 | 0.227056  |
| C | 13.184562 | -1.000195  | -4.082764 | -0.209119 |
| H | 12.273172 | -1.500563  | -3.787059 | 0.201070  |
| C | 13.252991 | -0.402428  | -5.359300 | -0.204596 |
| H | 12.364973 | -0.385621  | -5.981494 | 0.174652  |
| C | 14.440801 | 0.148621   | -5.828494 | -0.225037 |
| H | 14.490287 | 0.597287   | -6.814966 | 0.166298  |
| C | 15.580741 | 0.096481   | -5.010769 | -0.027734 |
| C | 21.222349 | -1.179316  | -1.782408 | -0.608153 |
| H | 20.266915 | -0.671172  | -1.612323 | 0.235916  |
| C | 20.942088 | -2.707426  | -1.908874 | -0.459975 |
| H | 21.710848 | -3.199849  | -2.516808 | 0.174157  |
| H | 20.982361 | -3.161576  | -0.907976 | 0.218689  |
| C | 19.545382 | -3.020636  | -2.439832 | 0.429882  |
| O | 18.561792 | -2.343019  | -2.130488 | -0.437141 |
| N | 19.438047 | -4.106190  | -3.260814 | -0.722062 |
| H | 18.506290 | -4.451862  | -3.479096 | 0.452399  |
| H | 20.205435 | -4.759233  | -3.344607 | 0.351893  |
| C | 17.531037 | -5.684470  | 6.364516  | -0.574489 |
| H | 17.230548 | -5.505918  | 7.411765  | 0.159708  |
| C | 16.371013 | -5.190451  | 5.477162  | -0.425134 |
| H | 15.441113 | -5.706547  | 5.762519  | 0.176213  |
| H | 16.185962 | -4.122080  | 5.653554  | 0.175561  |
| C | 16.533711 | -5.377827  | 3.966493  | 0.446656  |
| O | 17.503822 | -6.035226  | 3.515590  | -0.514127 |
| O | 15.605684 | -4.825294  | 3.265646  | -0.617540 |
| C | 23.539906 | -12.033573 | -1.260623 | -0.545841 |
| H | 22.897977 | -12.357696 | -2.085168 | 0.183504  |
| C | 23.311336 | -10.529328 | -0.921437 | -0.447715 |
| H | 24.176057 | -10.201151 | -0.323491 | 0.197256  |
| H | 23.330811 | -9.938132  | -1.845979 | 0.178258  |
| C | 22.064698 | -10.199356 | -0.147864 | 0.226909  |
| N | 21.500398 | -11.065839 | 0.796057  | -0.566523 |
| C | 20.508348 | -10.374591 | 1.365633  | 0.118544  |
| H | 19.848037 | -10.731507 | 2.137821  | 0.195142  |
| N | 20.408210 | -9.109705  | 0.842597  | -0.387970 |
| H | 19.753105 | -8.364017  | 1.108752  | 0.474418  |
| C | 21.390461 | -8.994476  | -0.124324 | -0.204912 |
| H | 21.532569 | -8.086719  | -0.684692 | 0.166551  |
| N | 10.163439 | -7.979382  | -5.669490 | -0.693880 |
| H | 10.857121 | -8.106937  | -6.392102 | 0.321664  |
| C | 9.951803  | -9.124595  | -4.758390 | -0.220737 |
| H | 10.631265 | -9.903002  | -5.115339 | 0.213298  |
| C | 10.359725 | -8.741191  | -3.322606 | -0.445789 |
| H | 9.753570  | -7.885020  | -3.007457 | 0.234437  |
| H | 10.144637 | -9.566396  | -2.629463 | 0.182474  |
| C | 11.847955 | -8.384355  | -3.194644 | 0.475876  |
| O | 12.619585 | -8.592669  | -4.171009 | -0.551270 |
| O | 12.207089 | -7.905616  | -2.059239 | -0.624805 |
| H | 13.791142 | -8.206361  | -1.497569 | 0.514797  |

|   |           |            |            |           |
|---|-----------|------------|------------|-----------|
| O | 16.401426 | -5.041568  | -3.946389  | -0.403392 |
| C | 15.302717 | -4.398519  | -4.301393  | 0.486659  |
| C | 15.295958 | -3.566519  | -5.530637  | -0.741633 |
| H | 15.373097 | -4.216547  | -6.407296  | 0.281287  |
| H | 16.166212 | -2.904970  | -5.511979  | 0.251948  |
| H | 14.391996 | -2.960046  | -5.576087  | 0.259205  |
| N | 14.294653 | -4.558154  | -3.489730  | -0.486215 |
| H | 13.245914 | -4.245941  | -3.669248  | 0.427022  |
| C | 14.741243 | -5.286328  | -2.286024  | -0.223041 |
| H | 13.955567 | -5.950201  | -1.925109  | 0.356337  |
| C | 15.270882 | -4.338531  | -1.213595  | 0.075377  |
| O | 14.247499 | -3.542327  | -0.610403  | -0.723703 |
| H | 14.640518 | -3.321795  | 0.265462   | 0.451199  |
| H | 16.014622 | -3.665020  | -1.662309  | 0.232521  |
| C | 15.962310 | -5.149660  | -0.115066  | -0.123645 |
| O | 16.324174 | -4.215371  | 0.878977   | -0.690727 |
| H | 16.077987 | -4.552134  | 1.812028   | 0.536361  |
| H | 15.252141 | -5.890963  | 0.274327   | 0.257225  |
| C | 17.196014 | -5.867274  | -0.682948  | 0.032915  |
| C | 17.647623 | -7.100355  | 0.128956   | -0.306969 |
| O | 18.602988 | -6.814802  | 1.142168   | -0.695855 |
| H | 18.147775 | -6.472366  | 1.962292   | 0.523226  |
| H | 16.766905 | -7.610378  | 0.535601   | 0.225815  |
| H | 18.127059 | -7.783254  | -0.579165  | 0.218611  |
| H | 18.017369 | -5.146556  | -0.740413  | 0.259482  |
| O | 16.982963 | -6.393269  | -2.044991  | -0.382375 |
| C | 15.938526 | -6.071618  | -2.834039  | 0.100501  |
| H | 15.661379 | -6.935754  | -3.439010  | 0.347531  |
| O | 14.678571 | -8.303199  | -1.064401  | -0.691472 |
| C | 15.082202 | -9.661310  | -1.193752  | -0.433021 |
| H | 14.399108 | -10.343278 | -0.664838  | 0.183708  |
| H | 16.076827 | -9.760673  | -0.748802  | 0.199976  |
| H | 15.140860 | -9.972425  | -2.246347  | 0.194961  |
| H | 19.022554 | 2.135431   | -7.433201  | 0.183147  |
| H | 19.663687 | 1.300976   | -6.028144  | 0.184818  |
| H | 21.660294 | -0.784578  | -2.698019  | 0.186603  |
| H | 21.825704 | -1.017311  | -0.890380  | 0.198817  |
| H | 24.586562 | -12.083963 | -1.557266  | 0.166604  |
| H | 23.318300 | -12.638787 | -0.382793  | 0.217004  |
| H | 18.424858 | -5.078131  | 6.225476   | 0.192326  |
| H | 17.642283 | -6.764702  | 6.283173   | 0.200236  |
| H | 15.031963 | -6.003978  | -11.288983 | 0.198498  |
| H | 16.728088 | -5.285108  | -11.033937 | 0.188681  |
| H | 9.346876  | -5.050385  | -6.910372  | 0.227859  |
| H | 8.945542  | -9.540735  | -4.775523  | 0.200743  |
| H | 13.589160 | -1.712456  | 3.398390   | 0.140603  |
| H | 12.353669 | -3.924126  | 6.198050   | 0.179461  |
| H | 8.934860  | -3.336706  | -0.027563  | 0.165486  |



**m1'**, ET = -3853.439964

|   |           |           |            |           |
|---|-----------|-----------|------------|-----------|
| C | 12.709892 | -2.241313 | 3.763317   | 0.347920  |
| O | 11.606988 | -1.694171 | 3.834061   | -0.539691 |
| N | 12.998003 | -3.479692 | 4.264929   | -0.532998 |
| H | 13.920943 | -3.888652 | 4.081999   | 0.438861  |
| C | 12.050855 | -4.158640 | 5.178624   | -0.284620 |
| H | 11.066109 | -3.730002 | 4.978368   | 0.215573  |
| C | 12.070695 | -5.698338 | 4.999992   | -0.472750 |
| H | 13.091489 | -6.050991 | 5.196623   | 0.212089  |
| H | 11.425820 | -6.128194 | 5.778270   | 0.187953  |
| C | 11.626705 | -6.198052 | 3.634779   | -0.002406 |
| C | 10.268333 | -6.380726 | 3.338621   | -0.234644 |
| H | 9.520797  | -6.137695 | 4.089248   | 0.164929  |
| C | 9.856364  | -6.879328 | 2.102891   | -0.259449 |
| H | 8.803406  | -7.024006 | 1.879613   | 0.159008  |
| C | 10.805594 | -7.213740 | 1.126703   | 0.402340  |
| O | 10.340587 | -7.690532 | -0.063913  | -0.617023 |
| H | 11.071252 | -7.786741 | -0.735291  | 0.505385  |
| C | 12.169095 | -7.049790 | 1.410060   | -0.315022 |
| H | 12.918932 | -7.339166 | 0.677704   | 0.223365  |
| C | 12.564856 | -6.539344 | 2.650829   | -0.262056 |
| H | 13.622721 | -6.401821 | 2.853850   | 0.251559  |
| C | 9.378429  | -4.122116 | -0.637746  | -0.600821 |
| H | 8.955172  | -5.076890 | -0.309241  | 0.232437  |
| H | 9.113030  | -3.979824 | -1.694983  | 0.214274  |
| C | 10.887624 | -4.185303 | -0.478603  | -0.328359 |
| H | 11.197339 | -4.117885 | 0.570331   | 0.254785  |
| H | 11.281025 | -5.119235 | -0.892334  | 0.258032  |
| N | 11.542619 | -3.081577 | -1.256610  | -0.808664 |
| H | 11.093437 | -2.181708 | -1.075107  | 0.377423  |
| H | 12.539536 | -3.028319 | -0.990865  | 0.483851  |
| H | 11.534479 | -3.336287 | -2.350324  | 0.421849  |
| C | 10.144613 | -5.689771 | -6.535184  | -0.455818 |
| H | 10.625359 | -6.157726 | -7.404406  | 0.172370  |
| C | 11.230968 | -4.834208 | -5.807160  | -0.483509 |
| H | 12.083759 | -5.470002 | -5.561867  | 0.239530  |
| H | 11.599626 | -4.053081 | -6.487807  | 0.215076  |
| C | 10.783333 | -4.132763 | -4.507995  | 0.668954  |
| O | 9.627206  | -3.786131 | -4.253364  | -0.497412 |
| O | 11.825934 | -3.870358 | -3.674073  | -0.598158 |
| C | 9.630985  | -6.756668 | -5.552185  | 0.675919  |
| O | 8.771503  | -6.484213 | -4.711182  | -0.504818 |
| C | 15.649650 | -5.136348 | -11.061831 | -0.543728 |
| H | 15.458859 | -4.382765 | -11.838764 | 0.178485  |
| C | 15.169372 | -4.574327 | -9.686125  | -0.436593 |
| H | 15.817660 | -3.738447 | -9.391424  | 0.196450  |
| H | 14.158443 | -4.166351 | -9.806962  | 0.190942  |
| C | 15.134205 | -5.614132 | -8.569051  | -0.014687 |
| C | 16.309917 | -6.100563 | -7.970243  | -0.248196 |
| H | 17.274501 | -5.760179 | -8.336318  | 0.176568  |
| C | 16.267143 | -6.988234 | -6.894185  | -0.245712 |
| H | 17.180073 | -7.338952 | -6.423360  | 0.176569  |
| C | 15.034147 | -7.413433 | -6.372090  | 0.412267  |
| O | 15.046890 | -8.220933 | -5.279751  | -0.611120 |
| H | 14.135266 | -8.345086 | -4.885840  | 0.516378  |
| C | 13.854394 | -6.979695 | -6.991528  | -0.301549 |
| H | 12.900858 | -7.323231 | -6.604371  | 0.191245  |
| C | 13.913933 | -6.089000 | -8.069106  | -0.238084 |

|   |           |            |           |           |
|---|-----------|------------|-----------|-----------|
| H | 12.986672 | -5.738407  | -8.513722 | 0.179441  |
| C | 18.807985 | 1.861833   | -6.401184 | -0.550513 |
| H | 18.673737 | 2.762309   | -5.795531 | 0.194603  |
| C | 17.500565 | 1.043438   | -6.488681 | -0.452274 |
| H | 16.736576 | 1.690883   | -6.941431 | 0.194956  |
| H | 17.657052 | 0.215395   | -7.197470 | 0.199016  |
| C | 16.958926 | 0.492202   | -5.204875 | 0.006354  |
| C | 17.626005 | 0.155315   | -4.054312 | -0.144116 |
| H | 18.671480 | 0.246421   | -3.809289 | 0.189214  |
| N | 16.741560 | -0.386203  | -3.123102 | -0.355883 |
| H | 17.086515 | -1.020624  | -2.408949 | 0.416080  |
| C | 15.486743 | -0.477492  | -3.708688 | 0.098232  |
| C | 14.291059 | -1.030182  | -3.237833 | -0.287668 |
| H | 14.240070 | -1.497493  | -2.260236 | 0.227410  |
| C | 13.181399 | -0.989571  | -4.080347 | -0.208837 |
| H | 12.269213 | -1.488249  | -3.784256 | 0.200933  |
| C | 13.249995 | -0.391007  | -5.356489 | -0.204609 |
| H | 12.361583 | -0.372034  | -5.978058 | 0.174545  |
| C | 14.438628 | 0.157707   | -5.826236 | -0.225128 |
| H | 14.488377 | 0.606773   | -6.812523 | 0.166157  |
| C | 15.579128 | 0.102293   | -5.009511 | -0.027741 |
| C | 21.222349 | -1.179317  | -1.782409 | -0.608126 |
| H | 20.267157 | -0.670668  | -1.612310 | 0.235888  |
| C | 20.940962 | -2.707074  | -1.908755 | -0.459785 |
| H | 21.710205 | -3.200268  | -2.515474 | 0.173960  |
| H | 20.979394 | -3.160981  | -0.907673 | 0.218684  |
| C | 19.544752 | -3.019050  | -2.441683 | 0.430024  |
| O | 18.560708 | -2.342207  | -2.132121 | -0.437124 |
| N | 19.438350 | -4.102627  | -3.265319 | -0.722335 |
| H | 18.506639 | -4.447638  | -3.484721 | 0.452717  |
| H | 20.205508 | -4.755968  | -3.348801 | 0.351687  |
| C | 17.531037 | -5.684471  | 6.364516  | -0.574458 |
| H | 17.230051 | -5.505545  | 7.411559  | 0.159577  |
| C | 16.370935 | -5.191482  | 5.476117  | -0.424996 |
| H | 15.440988 | -5.706648  | 5.763007  | 0.176192  |
| H | 16.186383 | -4.122786  | 5.651056  | 0.175383  |
| C | 16.531562 | -5.381103  | 3.965076  | 0.447086  |
| O | 17.499043 | -6.041705  | 3.513135  | -0.514114 |
| O | 15.603966 | -4.826801  | 3.264899  | -0.617808 |
| C | 23.539905 | -12.033574 | -1.260625 | -0.545718 |
| H | 22.898458 | -12.358293 | -2.085325 | 0.183252  |
| C | 23.308377 | -10.529944 | -0.920845 | -0.447789 |
| H | 24.170024 | -10.201337 | -0.318748 | 0.197319  |
| H | 23.330703 | -9.937498  | -1.844508 | 0.178140  |
| C | 22.057657 | -10.203741 | -0.152132 | 0.226656  |
| N | 21.489201 | -11.074668 | 0.785228  | -0.566750 |
| C | 20.493578 | -10.386539 | 1.352468  | 0.118481  |
| H | 19.830054 | -10.747048 | 2.120237  | 0.195065  |
| N | 20.394904 | -9.119700  | 0.834131  | -0.387950 |
| H | 19.738259 | -8.375277  | 1.100776  | 0.475011  |
| C | 21.382241 | -8.999508  | -0.127022 | -0.204894 |
| H | 21.526722 | -8.089104  | -0.682470 | 0.166607  |
| N | 10.163439 | -7.979382  | -5.669490 | -0.694134 |
| H | 10.857121 | -8.106937  | -6.392102 | 0.321460  |
| C | 9.951803  | -9.124595  | -4.758391 | -0.220328 |
| H | 10.631798 | -9.902686  | -5.114996 | 0.212554  |
| C | 10.357075 | -8.741965  | -3.321400 | -0.444246 |
| H | 9.749263  | -7.886557  | -3.007487 | 0.234956  |
| H | 10.140929 | -9.567606  | -2.629141 | 0.183029  |
| C | 11.844017 | -8.380916  | -3.189496 | 0.460547  |
| O | 12.618254 | -8.583940  | -4.165021 | -0.548518 |
| O | 12.197226 | -7.901433  | -2.052726 | -0.617940 |
| H | 13.789696 | -8.145910  | -1.490642 | 0.502261  |

|   |           |            |            |           |
|---|-----------|------------|------------|-----------|
| O | 16.401208 | -5.027177  | -3.952048  | -0.404207 |
| C | 15.303670 | -4.381984  | -4.306567  | 0.487573  |
| C | 15.296886 | -3.551627  | -5.536977  | -0.741789 |
| H | 15.369954 | -4.202888  | -6.413120  | 0.280950  |
| H | 16.168993 | -2.892486  | -5.521074  | 0.251762  |
| H | 14.394478 | -2.942692  | -5.581140  | 0.259396  |
| N | 14.295900 | -4.539385  | -3.494229  | -0.485376 |
| H | 13.246497 | -4.230172  | -3.673792  | 0.426769  |
| C | 14.740596 | -5.270839  | -2.291858  | -0.213589 |
| H | 13.952724 | -5.932525  | -1.933494  | 0.351581  |
| C | 15.270715 | -4.328358  | -1.215295  | 0.073474  |
| O | 14.246637 | -3.533741  | -0.610803  | -0.723787 |
| H | 14.638014 | -3.317030  | 0.266751   | 0.451133  |
| H | 16.016025 | -3.653940  | -1.660057  | 0.232793  |
| C | 15.958587 | -5.145347  | -0.118491  | -0.126260 |
| O | 16.323866 | -4.214531  | 0.877994   | -0.690853 |
| H | 16.077039 | -4.552588  | 1.810288   | 0.536246  |
| H | 15.245743 | -5.884723  | 0.268740   | 0.262505  |
| C | 17.189893 | -5.867046  | -0.687296  | 0.039046  |
| C | 17.633455 | -7.106138  | 0.120502   | -0.310212 |
| O | 18.589304 | -6.827282  | 1.135884   | -0.695961 |
| H | 18.137278 | -6.482585  | 1.956912   | 0.522043  |
| H | 16.749476 | -7.614193  | 0.522381   | 0.231239  |
| H | 18.111770 | -7.788310  | -0.589250  | 0.214900  |
| H | 18.015014 | -5.150189  | -0.738967  | 0.258928  |
| O | 16.978968 | -6.384883  | -2.052723  | -0.382474 |
| C | 15.935733 | -6.058283  | -2.840823  | 0.095242  |
| H | 15.655750 | -6.920191  | -3.447378  | 0.345517  |
| O | 14.674244 | -8.212950  | -1.041592  | -0.938309 |
| H | 15.012165 | -9.091849  | -1.266461  | 0.407679  |
| H | 19.022553 | 2.135431   | -7.433201  | 0.183036  |
| H | 19.663686 | 1.300975   | -6.028145  | 0.184763  |
| H | 21.660294 | -0.784579  | -2.698020  | 0.186502  |
| H | 21.825704 | -1.017312  | -0.890381  | 0.198770  |
| H | 24.586561 | -12.083963 | -1.557268  | 0.166522  |
| H | 23.318299 | -12.638788 | -0.382795  | 0.217009  |
| H | 18.424858 | -5.078132  | 6.225476   | 0.192038  |
| H | 17.642283 | -6.764703  | 6.283173   | 0.200234  |
| H | 15.031962 | -6.003978  | -11.288984 | 0.198429  |
| H | 16.728087 | -5.285108  | -11.033938 | 0.188671  |
| H | 9.346876  | -5.050385  | -6.910372  | 0.227827  |
| H | 8.945542  | -9.540736  | -4.775524  | 0.200822  |
| H | 13.589160 | -1.712456  | 3.398390   | 0.140465  |
| H | 12.353669 | -3.924126  | 6.198050   | 0.179251  |
| H | 8.934860  | -3.336706  | -0.027563  | 0.165504  |

**ts2**, ET = -3853.433162,

|   |           |           |            |           |
|---|-----------|-----------|------------|-----------|
| C | 12.709892 | -2.241313 | 3.763317   | 0.349837  |
| O | 11.606988 | -1.694171 | 3.834061   | -0.536837 |
| N | 12.996532 | -3.481098 | 4.263407   | -0.532277 |
| H | 13.921062 | -3.886157 | 4.085800   | 0.434855  |
| C | 12.050855 | -4.158640 | 5.178624   | -0.284454 |
| H | 11.065530 | -3.731951 | 4.978085   | 0.217097  |
| C | 12.075524 | -5.698747 | 5.003291   | -0.473273 |
| H | 13.097858 | -6.046519 | 5.201412   | 0.211245  |
| H | 11.433075 | -6.129532 | 5.782889   | 0.189557  |
| C | 11.633740 | -6.206760 | 3.640543   | -0.001161 |
| C | 10.276687 | -6.410323 | 3.351036   | -0.233711 |
| H | 9.529637  | -6.172877 | 4.103747   | 0.167800  |
| C | 9.865356  | -6.923684 | 2.121535   | -0.261440 |
| H | 8.813781  | -7.085525 | 1.904361   | 0.161922  |
| C | 10.814529 | -7.252723 | 1.143847   | 0.412029  |
| O | 10.355502 | -7.752275 | -0.038043  | -0.612139 |
| H | 11.093611 | -7.871166 | -0.696431  | 0.511543  |
| C | 12.176003 | -7.060801 | 1.418616   | -0.303881 |
| H | 12.920893 | -7.337434 | 0.676320   | 0.192764  |
| C | 12.572407 | -6.537185 | 2.653529   | -0.261975 |
| H | 13.628650 | -6.379232 | 2.850220   | 0.250824  |
| C | 9.378429  | -4.122116 | -0.637746  | -0.599947 |
| H | 8.935554  | -5.073280 | -0.324052  | 0.224887  |
| H | 9.135848  | -3.968426 | -1.698872  | 0.216508  |
| C | 10.888221 | -4.207064 | -0.449274  | -0.325177 |
| H | 11.176650 | -4.093372 | 0.602535   | 0.248960  |
| H | 11.261381 | -5.175106 | -0.799801  | 0.247039  |
| N | 11.590182 | -3.171688 | -1.275498  | -0.825542 |
| H | 11.179326 | -2.246126 | -1.137670  | 0.374699  |
| H | 12.586893 | -3.133260 | -1.014284  | 0.480553  |
| H | 11.578028 | -3.481339 | -2.399648  | 0.436715  |
| C | 10.144613 | -5.689771 | -6.535184  | -0.454298 |
| H | 10.620602 | -6.160039 | -7.406117  | 0.169879  |
| C | 11.234409 | -4.836111 | -5.815000  | -0.479530 |
| H | 12.098357 | -5.464706 | -5.593471  | 0.241004  |
| H | 11.581553 | -4.042731 | -6.492296  | 0.217790  |
| C | 10.800765 | -4.159789 | -4.496948  | 0.659354  |
| O | 9.647978  | -3.802771 | -4.231247  | -0.503443 |
| O | 11.852468 | -3.942428 | -3.669377  | -0.588140 |
| C | 9.630985  | -6.756668 | -5.552185  | 0.676486  |
| O | 8.771503  | -6.484213 | -4.711182  | -0.505166 |
| C | 15.649649 | -5.136348 | -11.061832 | -0.543421 |
| H | 15.459319 | -4.384816 | -11.841286 | 0.177631  |
| C | 15.167952 | -4.570444 | -9.689745  | -0.437440 |
| H | 15.812233 | -3.730594 | -9.399296  | 0.198772  |
| H | 14.154669 | -4.168309 | -9.810217  | 0.191936  |
| C | 15.143940 | -5.602543 | -8.566134  | -0.010874 |
| C | 16.318098 | -5.994869 | -7.902048  | -0.240870 |
| H | 17.273068 | -5.590347 | -8.224965  | 0.177057  |
| C | 16.281986 | -6.858077 | -6.806524  | -0.243882 |
| H | 17.191711 | -7.123818 | -6.277987  | 0.174135  |
| C | 15.055960 | -7.346306 | -6.333206  | 0.426400  |
| O | 15.065609 | -8.112683 | -5.202044  | -0.636265 |
| H | 14.145493 | -8.270365 | -4.848055  | 0.518591  |
| C | 13.882023 | -7.017615 | -7.020418  | -0.300214 |
| H | 12.934288 | -7.409263 | -6.665068  | 0.185143  |
| C | 13.934790 | -6.151135 | -8.118094  | -0.232765 |

|   |           |            |           |           |
|---|-----------|------------|-----------|-----------|
| H | 13.008954 | -5.871082  | -8.612747 | 0.177839  |
| C | 18.807984 | 1.861833   | -6.401186 | -0.550064 |
| H | 18.683154 | 2.765872   | -5.797900 | 0.193203  |
| C | 17.493424 | 1.052694   | -6.470005 | -0.451422 |
| H | 16.732049 | 1.701156   | -6.925453 | 0.193236  |
| H | 17.637719 | 0.214626   | -7.169375 | 0.200022  |
| C | 16.952215 | 0.519642   | -5.175951 | 0.008620  |
| C | 17.628675 | 0.134612   | -4.044536 | -0.153149 |
| H | 18.681324 | 0.183663   | -3.818203 | 0.185332  |
| N | 16.743568 | -0.397801  | -3.110630 | -0.353176 |
| H | 17.070568 | -1.033069  | -2.387237 | 0.424577  |
| C | 15.476251 | -0.432045  | -3.671504 | 0.095374  |
| C | 14.278643 | -0.978737  | -3.198197 | -0.284703 |
| H | 14.234001 | -1.484039  | -2.240102 | 0.233918  |
| C | 13.158254 | -0.898089  | -4.021478 | -0.203077 |
| H | 12.253074 | -1.416305  | -3.733513 | 0.194056  |
| C | 13.215980 | -0.258842  | -5.278396 | -0.197351 |
| H | 12.319783 | -0.209383  | -5.887081 | 0.170995  |
| C | 14.407468 | 0.278699   | -5.753067 | -0.224421 |
| H | 14.450041 | 0.750227   | -6.729290 | 0.163036  |
| C | 15.562793 | 0.174636   | -4.960529 | -0.034271 |
| C | 21.222348 | -1.179317  | -1.782411 | -0.612976 |
| H | 20.277107 | -0.652856  | -1.605942 | 0.236637  |
| C | 20.901312 | -2.697550  | -1.921203 | -0.449336 |
| H | 21.642436 | -3.203285  | -2.552166 | 0.166627  |
| H | 20.944239 | -3.164484  | -0.927598 | 0.212074  |
| C | 19.479518 | -2.935269  | -2.426714 | 0.422565  |
| O | 18.523676 | -2.311923  | -1.948666 | -0.450617 |
| N | 19.315713 | -3.872994  | -3.394596 | -0.737568 |
| H | 18.371081 | -4.112078  | -3.710373 | 0.490139  |
| H | 20.100984 | -4.401987  | -3.746164 | 0.344530  |
| C | 17.531037 | -5.684472  | 6.364516  | -0.574620 |
| H | 17.235706 | -5.506601  | 7.413559  | 0.161115  |
| C | 16.366084 | -5.191712  | 5.484665  | -0.427144 |
| H | 15.435577 | -5.698505  | 5.785090  | 0.177371  |
| H | 16.189635 | -4.119938  | 5.646243  | 0.177594  |
| C | 16.521495 | -5.408983  | 3.979869  | 0.453263  |
| O | 17.468886 | -6.116304  | 3.552527  | -0.519849 |
| O | 15.623109 | -4.835915  | 3.260053  | -0.616109 |
| C | 23.539905 | -12.033574 | -1.260627 | -0.546218 |
| H | 22.902318 | -12.367276 | -2.085177 | 0.183085  |
| C | 23.280909 | -10.536498 | -0.920805 | -0.450636 |
| H | 24.138690 | -10.183332 | -0.327584 | 0.197715  |
| H | 23.273141 | -9.942080  | -1.843291 | 0.180184  |
| C | 22.026824 | -10.260982 | -0.136551 | 0.227552  |
| N | 21.472018 | -11.188370 | 0.754154  | -0.565673 |
| C | 20.457628 | -10.551675 | 1.346021  | 0.119666  |
| H | 19.798195 | -10.963360 | 2.091300  | 0.193941  |
| N | 20.333391 | -9.264291  | 0.887348  | -0.389572 |
| H | 19.658946 | -8.549811  | 1.185645  | 0.474438  |
| C | 21.323560 | -9.075287  | -0.060402 | -0.207513 |
| H | 21.449606 | -8.136373  | -0.571144 | 0.170635  |
| N | 10.163439 | -7.979382  | -5.669490 | -0.695339 |
| H | 10.857121 | -8.106937  | -6.392102 | 0.321930  |
| C | 9.951803  | -9.124595  | -4.758391 | -0.221644 |
| H | 10.631851 | -9.903929  | -5.112072 | 0.212104  |
| C | 10.346841 | -8.739980  | -3.320448 | -0.449664 |
| H | 9.769303  | -7.853359  | -3.034213 | 0.238184  |
| H | 10.081135 | -9.539996  | -2.616131 | 0.185311  |
| C | 11.840714 | -8.446707  | -3.170888 | 0.475796  |
| O | 12.616355 | -8.616710  | -4.149245 | -0.544897 |
| O | 12.214920 | -8.058825  | -2.001279 | -0.635111 |
| H | 13.791029 | -8.142211  | -1.810923 | 0.527078  |

|   |           |            |            |           |
|---|-----------|------------|------------|-----------|
| O | 16.588151 | -4.620480  | -4.124805  | -0.512533 |
| C | 15.408845 | -4.246364  | -4.364687  | 0.446730  |
| C | 15.055833 | -3.423578  | -5.570027  | -0.742888 |
| H | 15.313294 | -3.992312  | -6.467367  | 0.256865  |
| H | 15.648667 | -2.505647  | -5.553096  | 0.256991  |
| H | 13.999192 | -3.157975  | -5.580693  | 0.229033  |
| N | 14.428079 | -4.611374  | -3.523523  | -0.519854 |
| H | 13.408751 | -4.355339  | -3.676492  | 0.390871  |
| C | 14.839575 | -5.269784  | -2.289766  | -0.183302 |
| H | 13.968975 | -5.790177  | -1.881960  | 0.327097  |
| C | 15.431393 | -4.329801  | -1.236983  | 0.064235  |
| O | 14.437698 | -3.443581  | -0.712101  | -0.714195 |
| H | 14.822775 | -3.168159  | 0.148495   | 0.448898  |
| H | 16.240353 | -3.740255  | -1.682783  | 0.275049  |
| C | 15.998009 | -5.151329  | -0.075025  | -0.114737 |
| O | 16.427054 | -4.228242  | 0.895980   | -0.679694 |
| H | 16.152634 | -4.536030  | 1.829852   | 0.533052  |
| H | 15.200420 | -5.795770  | 0.321674   | 0.237199  |
| C | 17.165148 | -6.024584  | -0.555025  | 0.011229  |
| C | 17.465269 | -7.279848  | 0.293922   | -0.280963 |
| O | 18.471088 | -7.053901  | 1.264217   | -0.692236 |
| H | 18.062151 | -6.650993  | 2.088297   | 0.527114  |
| H | 16.538656 | -7.650927  | 0.747083   | 0.222395  |
| H | 17.832437 | -8.053947  | -0.387616  | 0.217922  |
| H | 18.067331 | -5.416792  | -0.643346  | 0.282390  |
| O | 16.938954 | -6.546196  | -1.940771  | -0.230861 |
| C | 15.887703 | -6.309810  | -2.628685  | 0.054502  |
| H | 15.807228 | -6.874713  | -3.554256  | 0.397441  |
| O | 14.792068 | -8.128368  | -1.635482  | -0.916323 |
| H | 15.140574 | -8.906645  | -2.099984  | 0.422517  |
| H | 19.022552 | 2.135431   | -7.433203  | 0.180864  |
| H | 19.663685 | 1.300975   | -6.028147  | 0.183422  |
| H | 21.660293 | -0.784579  | -2.698022  | 0.184641  |
| H | 21.825703 | -1.017312  | -0.890383  | 0.196479  |
| H | 24.586561 | -12.083963 | -1.557270  | 0.166095  |
| H | 23.318299 | -12.638788 | -0.382797  | 0.218771  |
| H | 18.424858 | -5.078133  | 6.225476   | 0.192770  |
| H | 17.642283 | -6.764704  | 6.283173   | 0.202328  |
| H | 15.031961 | -6.003979  | -11.288985 | 0.196132  |
| H | 16.728086 | -5.285108  | -11.033939 | 0.188490  |
| H | 9.346876  | -5.050385  | -6.910372  | 0.226980  |
| H | 8.945542  | -9.540737  | -4.775524  | 0.202026  |
| H | 13.589160 | -1.712456  | 3.398390   | 0.141588  |
| H | 12.353669 | -3.924126  | 6.198050   | 0.180234  |
| H | 8.934860  | -3.336706  | -0.027563  | 0.166727  |

**Pd**, ET = -3853.459892

|   |           |           |            |           |
|---|-----------|-----------|------------|-----------|
| C | 12.705893 | -2.212052 | 3.766753   | 0.350181  |
| O | 11.602497 | -1.666010 | 3.838112   | -0.538539 |
| N | 12.992304 | -3.454711 | 4.265036   | -0.537257 |
| H | 13.915238 | -3.867015 | 4.082853   | 0.439965  |
| C | 12.051410 | -4.126827 | 5.187677   | -0.283187 |
| H | 11.063599 | -3.704237 | 4.989371   | 0.214663  |
| C | 12.075762 | -5.668862 | 5.043937   | -0.474473 |
| H | 13.100354 | -6.012319 | 5.234352   | 0.219697  |
| H | 11.442616 | -6.082171 | 5.840180   | 0.189038  |
| C | 11.614889 | -6.200882 | 3.700085   | -0.003085 |
| C | 10.260005 | -6.458732 | 3.450447   | -0.229487 |
| H | 9.526378  | -6.250277 | 4.224037   | 0.173841  |
| C | 9.833390  | -6.987566 | 2.231379   | -0.262966 |
| H | 8.783805  | -7.189249 | 2.041342   | 0.166184  |
| C | 10.773919 | -7.273202 | 1.239120   | 0.410898  |
| O | 10.314039 | -7.801631 | 0.054678   | -0.606251 |
| H | 11.060438 | -7.874384 | -0.568786  | 0.495250  |
| C | 12.130688 | -7.025033 | 1.468435   | -0.302206 |
| H | 12.867343 | -7.257181 | 0.702235   | 0.176832  |
| C | 12.542578 | -6.486053 | 2.689638   | -0.262528 |
| H | 13.595095 | -6.277490 | 2.855679   | 0.284803  |
| C | 9.369252  | -4.106928 | -0.624293  | -0.596830 |
| H | 8.937907  | -5.058570 | -0.295129  | 0.216041  |
| H | 9.110261  | -3.959697 | -1.682633  | 0.216329  |
| C | 10.886488 | -4.177568 | -0.455900  | -0.324342 |
| H | 11.179831 | -4.086472 | 0.597030   | 0.251605  |
| H | 11.261704 | -5.137982 | -0.826477  | 0.227314  |
| N | 11.585045 | -3.130319 | -1.266318  | -0.827399 |
| H | 11.184586 | -2.205882 | -1.095676  | 0.370772  |
| H | 12.588677 | -3.101762 | -1.017788  | 0.481844  |
| H | 11.549269 | -3.441028 | -2.417141  | 0.438224  |
| C | 10.127385 | -5.687504 | -6.519330  | -0.454417 |
| H | 10.606238 | -6.157817 | -7.388442  | 0.171450  |
| C | 11.204344 | -4.825307 | -5.795363  | -0.476715 |
| H | 12.079248 | -5.438301 | -5.571173  | 0.231796  |
| H | 11.538806 | -4.025651 | -6.470264  | 0.229201  |
| C | 10.738016 | -4.158786 | -4.480011  | 0.659406  |
| O | 9.587781  | -3.755175 | -4.270509  | -0.510767 |
| O | 11.754243 | -4.025562 | -3.606542  | -0.585202 |
| C | 9.616630  | -6.752683 | -5.532984  | 0.675015  |
| O | 8.758226  | -6.479232 | -4.691188  | -0.500938 |
| C | 15.624266 | -5.138437 | -11.056425 | -0.542548 |
| H | 15.433751 | -4.393616 | -11.842605 | 0.177758  |
| C | 15.147090 | -4.556948 | -9.689972  | -0.439284 |
| H | 15.782962 | -3.706964 | -9.413019  | 0.203787  |
| H | 14.126774 | -4.171694 | -9.805777  | 0.191115  |
| C | 15.153968 | -5.588249 | -8.569467  | -0.009433 |
| C | 16.342509 | -5.951417 | -7.916018  | -0.222590 |
| H | 17.276965 | -5.485290 | -8.212863  | 0.183055  |
| C | 16.345220 | -6.868911 | -6.866433  | -0.247470 |
| H | 17.262290 | -7.118142 | -6.343392  | 0.182649  |
| C | 15.142996 | -7.441689 | -6.438501  | 0.432116  |
| O | 15.191163 | -8.310393 | -5.377642  | -0.610809 |
| H | 14.288256 | -8.478954 | -5.038947  | 0.498710  |
| C | 13.951595 | -7.116888 | -7.093623  | -0.297606 |
| H | 13.017593 | -7.563137 | -6.763159  | 0.162632  |
| C | 13.965889 | -6.196046 | -8.146343  | -0.230338 |

|   |           |            |           |           |
|---|-----------|------------|-----------|-----------|
| H | 13.030412 | -5.930234  | -8.630323 | 0.176484  |
| C | 18.782406 | 1.874196   | -6.417432 | -0.547005 |
| H | 18.656628 | 2.777964   | -5.814324 | 0.192111  |
| C | 17.466381 | 1.058905   | -6.478074 | -0.453378 |
| H | 16.700956 | 1.704782   | -6.929110 | 0.189828  |
| H | 17.611224 | 0.221539   | -7.177859 | 0.198947  |
| C | 16.937211 | 0.531571   | -5.174598 | 0.009791  |
| C | 17.645484 | -0.004190  | -4.124466 | -0.166709 |
| H | 18.710313 | -0.103394  | -3.990320 | 0.185525  |
| N | 16.780302 | -0.475595  | -3.149155 | -0.332902 |
| H | 17.102041 | -1.123012  | -2.430343 | 0.445734  |
| C | 15.479701 | -0.297213  | -3.580535 | 0.086925  |
| C | 14.262864 | -0.665510  | -2.994424 | -0.272979 |
| H | 14.245360 | -1.205137  | -2.054827 | 0.234134  |
| C | 13.093886 | -0.354337  | -3.682221 | -0.191041 |
| H | 12.134200 | -0.645053  | -3.269076 | 0.169406  |
| C | 13.128762 | 0.316327   | -4.925138 | -0.192794 |
| H | 12.195824 | 0.543337   | -5.429221 | 0.165192  |
| C | 14.337685 | 0.673877   | -5.511846 | -0.226398 |
| H | 14.355593 | 1.176898   | -6.473180 | 0.159919  |
| C | 15.537259 | 0.362365   | -4.848294 | -0.029931 |
| C | 21.207932 | -1.153388  | -1.795576 | -0.616855 |
| H | 20.269784 | -0.615777  | -1.614954 | 0.239011  |
| C | 20.863988 | -2.668569  | -1.921778 | -0.446935 |
| H | 21.568488 | -3.183385  | -2.586464 | 0.162195  |
| H | 20.940229 | -3.137658  | -0.931965 | 0.208118  |
| C | 19.416998 | -2.864595  | -2.369628 | 0.426894  |
| O | 18.502817 | -2.245616  | -1.804101 | -0.464336 |
| N | 19.192192 | -3.721511  | -3.390516 | -0.728268 |
| H | 18.231117 | -3.915410  | -3.694578 | 0.508391  |
| H | 19.947421 | -4.266070  | -3.781319 | 0.337880  |
| C | 17.535262 | -5.643658  | 6.368002  | -0.574422 |
| H | 17.256867 | -5.466247  | 7.422523  | 0.158137  |
| C | 16.352433 | -5.150605  | 5.513516  | -0.422797 |
| H | 15.418541 | -5.601557  | 5.885351  | 0.171545  |
| H | 16.225235 | -4.065479  | 5.623334  | 0.176312  |
| C | 16.418921 | -5.459286  | 4.017331  | 0.449586  |
| O | 17.313771 | -6.226591  | 3.584987  | -0.514267 |
| O | 15.499286 | -4.896554  | 3.315266  | -0.624476 |
| C | 23.538691 | -12.003786 | -1.252269 | -0.546894 |
| H | 22.903016 | -12.345125 | -2.075617 | 0.181102  |
| C | 23.254213 | -10.512183 | -0.910980 | -0.450245 |
| H | 24.091850 | -10.151659 | -0.293928 | 0.197257  |
| H | 23.257029 | -9.909944  | -1.828105 | 0.178751  |
| C | 21.976000 | -10.269621 | -0.155262 | 0.228561  |
| N | 21.479485 | -11.178887 | 0.788128  | -0.567892 |
| C | 20.415031 | -10.580934 | 1.330936  | 0.107712  |
| H | 19.779344 | -10.991279 | 2.097335  | 0.189637  |
| N | 20.203800 | -9.336659  | 0.794294  | -0.384527 |
| H | 19.476780 | -8.656875  | 1.057103  | 0.497354  |
| C | 21.189372 | -9.134853  | -0.155336 | -0.217628 |
| H | 21.252259 | -8.223616  | -0.724581 | 0.172529  |
| N | 10.150301 | -7.975049  | -5.648304 | -0.701911 |
| H | 10.842887 | -8.103520  | -6.371782 | 0.326779  |
| C | 9.941438  | -9.118418  | -4.734204 | -0.229902 |
| H | 10.607482 | -9.905078  | -5.099108 | 0.219949  |
| C | 10.370628 | -8.731624  | -3.308336 | -0.477904 |
| H | 9.830783  | -7.821504  | -3.019317 | 0.260374  |
| H | 10.111231 | -9.513159  | -2.580701 | 0.210699  |
| C | 11.864499 | -8.500026  | -3.259660 | 0.465749  |
| O | 12.635285 | -8.762542  | -4.177252 | -0.434024 |
| O | 12.286203 | -8.002413  | -2.087341 | -0.598602 |
| H | 13.285831 | -7.853978  | -2.117860 | 0.568308  |



|   |           |            |            |           |
|---|-----------|------------|------------|-----------|
| O | 16.526589 | -4.205301  | -4.294922  | -0.491160 |
| C | 15.300714 | -4.017685  | -4.400106  | 0.400995  |
| C | 14.715830 | -3.217824  | -5.545586  | -0.745432 |
| H | 14.822000 | -3.797145  | -6.467936  | 0.231387  |
| H | 15.284853 | -2.291794  | -5.648524  | 0.254476  |
| H | 13.665103 | -2.973168  | -5.379697  | 0.213017  |
| N | 14.403559 | -4.527961  | -3.523903  | -0.542829 |
| H | 13.388278 | -4.334646  | -3.660303  | 0.377404  |
| C | 14.774872 | -5.201794  | -2.286184  | -0.132249 |
| H | 13.833598 | -5.542858  | -1.845343  | 0.237867  |
| C | 15.441279 | -4.295217  | -1.252116  | 0.066698  |
| O | 14.496409 | -3.324900  | -0.757554  | -0.721889 |
| H | 14.883069 | -3.076851  | 0.110337   | 0.444709  |
| H | 16.295665 | -3.771299  | -1.690817  | 0.287104  |
| C | 15.918731 | -5.140259  | -0.066300  | -0.112996 |
| O | 16.346604 | -4.235897  | 0.931913   | -0.684454 |
| H | 16.048292 | -4.559382  | 1.838563   | 0.533872  |
| H | 15.061628 | -5.724479  | 0.303874   | 0.196323  |
| C | 17.042348 | -6.093359  | -0.520096  | 0.013453  |
| C | 17.180166 | -7.397308  | 0.303632   | -0.258997 |
| O | 18.189470 | -7.338186  | 1.302163   | -0.711334 |
| H | 17.838325 | -6.874931  | 2.117017   | 0.527270  |
| H | 16.214716 | -7.683034  | 0.743654   | 0.192218  |
| H | 17.475575 | -8.187836  | -0.394832  | 0.197208  |
| H | 17.986646 | -5.548737  | -0.446137  | 0.259798  |
| O | 16.925007 | -6.423159  | -1.938104  | -0.397603 |
| C | 15.663140 | -6.454669  | -2.516473  | 0.131698  |
| H | 15.829952 | -6.620110  | -3.579164  | 0.291112  |
| O | 14.906011 | -7.605100  | -1.994142  | -0.732827 |
| H | 15.417194 | -8.398444  | -2.234939  | 0.440387  |
| H | 18.994928 | 2.145633   | -7.450427  | 0.176690  |
| H | 19.639348 | 1.315191   | -6.044493  | 0.182898  |
| H | 21.643857 | -0.760307  | -2.712847  | 0.181150  |
| H | 21.812539 | -0.988626  | -0.904943  | 0.193211  |
| H | 24.584866 | -12.053658 | -1.550578  | 0.164397  |
| H | 23.319192 | -12.607174 | -0.372694  | 0.218198  |
| H | 18.428182 | -5.036639  | 6.226045   | 0.191004  |
| H | 17.647626 | -6.723954  | 6.288983   | 0.204114  |
| H | 15.007184 | -6.007294  | -11.280522 | 0.193724  |
| H | 16.702914 | -5.285907  | -11.029984 | 0.190338  |
| H | 9.328322  | -5.049905  | -6.894674  | 0.234093  |
| H | 8.935647  | -9.535676  | -4.748663  | 0.218939  |
| H | 13.583956 | -1.683070  | 3.399181   | 0.146119  |
| H | 12.355633 | -3.889576  | 6.206052   | 0.181949  |
| H | 8.925811  | -3.320599  | -0.015220  | 0.170643  |
